# Supplementary material for: A Novel Source of Cultured Podocytes
Source: PubMed Central journal article supplement (PMC3861313; doi:10.1371/journal.pone.0081812), 2013-12-12
Supplement: pone.0081812.s009.pdf [file pone.0081812.s009.pdf]

**Table S1 - List of antibodies used for immunofluorescence, flow cytometry and western blot analysis.**

Antibodies used in this study are listed along with catalogue numbers and concentration and whenever applicable, protein size expressed in kDa. IF = Immunofluorescence, WB = Western Blotting, FC = Flow Cytometry

| PROTEIN             | Antibody                        | Concentration     | Band Size (Kda) |
|---------------------|---------------------------------|-------------------|-----------------|
| Actin Beta          | GeneTex #109639                 | 1:10000           | 42 kDa          |
| CD151               | Epitomics #5901-1               | 1:100 (IF)        | ----            |
| CITED1              | Abcam #ab55467                  | 5mg/ml (WB)       | 20 kDa          |
|                     | Novus Biological #H00004435-M03 | 1mg/ml (FC)       | ----            |
| COL4A1              | Shigei Research Institute #H12  | 1:500 (WB)        | 25, 50 kDa      |
| COL4A2              | Shigei Research Institute #H22  | 1:500 (WB)        | 25, 50 kDa      |
| COL4A3              | Shigei Research Institute #H31  | 1:500 (WB)        | 25, 50 kDa      |
| COL4A4              | Shigei Research Institute #RH42 | 1:500 (WB)        | 25, 50 kDa      |
| COL4A5              | Shigei Research Institute #H53  | 1:500 (WB)        | 25, 50 kDa      |
| ILK                 | Abcam #ab52480                  | 1:500 (WB)        | 51 Kda          |
| Integrin alpha 1    | Abcam #ab106267                 | 0.8mg/ml (WB)     | 131 kDa         |
| Integrin alpha 3    | Abcam #ab251428                 | 3.3mg/ml (WB)     | 131 kDa         |
| Integrin beta 5     | Abcam #ab95623                  | 2.5mg/ml (WB)     | 88 kDa          |
| Laminin alpha 5     | Abbotec #251457                 | 2mg/ml (WB)       | 37kDa           |
| Nephrin             | Santa Cruz #sc-28192            | 1mg/ml (IF)       | ----            |
|                     | Thermo Scientific PA5-25932     | 1mg/ml (FC)       | ----            |
| P-Cadherin          | Cell Signaling, #2189           | 1:25 (IF)         | ----            |
| Phalloidin          | Invitrogen #R415                | 1:1000 (IF)       | ----            |
| Podocalyxin         | Invitrogen #393800              | 1:100 (IF)        | ----            |
|                     | R&D #MAB1556                    | 1mg/ml (WB)       | 160 kDa         |
| Podocin             | Abcam #ab50339                  | 1mg/ml (FC mouse) | ----            |
|                     |                                 | 1:100 (IF)        | ----            |
| Six-2               | Santa Cruz                      | 1mg/ml (WB)       | 42 kDa          |
|                     |                                 | 1mg/ml (FC)       | ----            |
| Synaptopodin        | USBio #S9500                    | 1:100 (IF)        | ----            |
| Tropomyosin         | Abcam #7785                     | 8mg/ml            | 55 kDa          |
| VEGF                | Abcam #ab46154                  | 1mg/ml (WB)       | 43 kDa          |
| Wilms Tumor Protein | Abcam #ab52933                  | 1:100 (IF)        | ----            |
|                     |                                 | 1:500 (WB)        | 51kDa           |
|                     | R&D AF5729                      | 2.5mg/ml (FC)     | ----            |
|                     | Abcam #89901                    | 1:100 (FC mouse)  | ----            |
| Zonal Occludens 1   | Abcam #ab59720                  | 1mg/ml (IF)       | ----            |

## Supplementary Tables S2-S6

### Summary Tables for Ingenuity Pathway Analysis of Microarrays

A detailed list of genes compared for differential expression between undifferentiated hAKPC-P and de-differentiated hIPod and between differentiated hAKPC-P and re-differentiated hIPod. All fold variations listed are statistically significant ( $P < 0.05$ ).

**Table S2 – Summary table reporting fold variation for podocyte and slit diaphragm markers** A detailed list of podocyte and slit diaphragm genes compared for differential expression between de-differentiated hIPod and undifferentiated hAKPC-P (on the left, light grey) and between re-differentiated hIPod and differentiated hAKPC-P (on the right, dark grey). Positive values indicate a higher gene expression in the hIPod versus the hAKPC-P, while negative values indicate a higher gene expression in hAKPC-P. All fold variations listed are statistically significant ( $P < 0.05$ ).

| PODOCYTE AND SLIT DIAPHRAGM MARKERS                     |             |       |             |                                                       |             |       |             |
|---------------------------------------------------------|-------------|-------|-------------|-------------------------------------------------------|-------------|-------|-------------|
| hAKPC-P undifferentiated versus hIPod de-differentiated |             |       |             | hAKPC-P differentiated versus hIPod re-differentiated |             |       |             |
| Gene                                                    | Fold Change | Gene  | Fold Change | Gene                                                  | Fold Change | Gene  | Fold Change |
| ACTN4                                                   | ---         | LRRC7 | 3.51        | ACTN4                                                 | ---         | LRRC7 | 3.51        |
| CD2AP                                                   | 1.44        | NPHS1 | -1.26       | CD2AP                                                 | 1.44        | NPHS1 | -1.26       |
| CD36                                                    | 1.02        | NPHS2 | ---         | CD36                                                  | 1.02        | NPHS2 | ---         |
| CDH3                                                    | -1.35       | PDPN  | -1.40       | CDH3                                                  | -1.35       | PDPN  | -1.40       |
| CHKA                                                    | 2.29        | PLCE1 | -1.39       | CHKA                                                  | 2.29        | PLCE1 | -1.39       |
| CR1                                                     | -1.13       | PODXL | -4.78       | CR1                                                   | -1.13       | PODXL | -4.78       |
| CTNNB1                                                  | 1.13        | PTPRO | -1.08       | CTNNB1                                                | 1.13        | PTPRO | -1.08       |
| EFNB1                                                   | -2.44       | SYNPO | -1.38       | EFNB1                                                 | -2.44       | SYNPO | -1.38       |
| EZR                                                     | -1.02       | TJP1  | 1.32        | EZR                                                   | -1.02       | TJP1  | 1.32        |
| F Actin                                                 | ---         | TRPC6 | ---         | F Actin                                               | ---         | TRPC6 | ---         |
| FAT1                                                    | -1.49       | WT1   | 1.19        | FAT1                                                  | -1.49       | WT1   | 1.19        |
| LMX1B                                                   | -1.11       |       |             | LMX1B                                                 | -1.11       |       |             |

**Table S3 – Summary table reporting fold variation for markers for GBM formation** A detailed list of GBM related genes compared for differential expression between de-differentiated hIPod and undifferentiated hAKPC-P (on the left, light grey) and between re-differentiated hIPod and differentiated hAKPC-P (on the right, dark grey). Positive values indicate a higher gene expression in the hIPod versus the hAKPC-P, while negative values indicate a higher gene expression in hAKPC-P. All fold variations listed are statistically significant (P<0.05).

| GLOMERULAR BASEMENT MEMBRANE MARKERS                    |             |       |             |                                                       |             |       |             |
|---------------------------------------------------------|-------------|-------|-------------|-------------------------------------------------------|-------------|-------|-------------|
| hAKPC-P undifferentiated versus hIPod de-differentiated |             |       |             | hAKPC-P differentiated versus hIPod re-differentiated |             |       |             |
| Gene                                                    | Fold Change | Gene  | Fold Change | Gene                                                  | Fold Change | Gene  | Fold Change |
| AGRN                                                    | -1.37       | ITGAV | -1.41       | AGRN                                                  | ---         | ITGAV | 6.28        |
| CDH1                                                    | -1.13       | ITGB1 | -1.29       | CDH1                                                  | -2.37       | ITGB1 | 3.17        |
| COL4A1                                                  | -1.68       | ITGB3 | -1.58       | COL4A1                                                | 2.36        | ITGB3 | 20.80       |
| COL4A2                                                  | -1.21       | LAMA1 | 1.36        | COL4A2                                                | 2.87        | LAMA1 | ---         |
| COL4A3                                                  | -1.07       | LAMA5 | -2.46       | COL4A3                                                | -2.80       | LAMA5 | -2.67       |
| COL4A4                                                  | -1.14       | LAMB1 | -1.28       | COL4A4                                                | -2.56       | LAMB1 | 6.84        |
| COL4A5                                                  | -1.80       | LAMB2 | -2.28       | COL4A5                                                | -1.95       | LAMB2 | ---         |
| ELN                                                     | -1.18       | LAMC1 | -1.15       | ELN                                                   | -2.77       | LAMC1 | 7.18        |
| FN1                                                     | -1.06       | MPV17 | -1.49       | FN1                                                   | 19.65       | MPV17 | 6.27        |
| HSPG2                                                   | ---         | MYO1E | -1.14       | HSPG2                                                 | ---         | MYO1E | 2.12        |
| ILK                                                     | ---         | NID1  | 1.50        | ILK                                                   | 1.33        | NID1  | ---         |
| ITGA1                                                   | 1.37        | NID2  | -7.26       | ITGA1                                                 | 9.40        | NID2  | ---         |
| ITGA3                                                   | -1.42       | WT1   | 1.19        | ITGA3                                                 | 8.16        | WT1   | -1.62       |
| ITGA5                                                   | -2.16       |       |             | ITGA5                                                 | 2.58        |       |             |

**Table S4 – Summary table reporting fold variation for markers involved in cell cycle regulation in podocytes** A detailed list of cell cycle related genes compared for differential expression between de-differentiated hIPod and undifferentiated hAKPC-P (on the left, light grey) and between re-differentiated hIPod and differentiated hAKPC-P (on the right, dark grey). Positive values indicate a higher gene expression in the hIPod versus the hAKPC-P, while negative values indicate a higher gene expression in hAKPC-P. All fold variations listed are statistically significant ( $P < 0.05$ ).

| CELL CYCLE MARKERS                                      |             |            |             |                                                       |             |            |             |
|---------------------------------------------------------|-------------|------------|-------------|-------------------------------------------------------|-------------|------------|-------------|
| hAKPC-P undifferentiated versus hIPod de-differentiated |             |            |             | hAKPC-P differentiated versus hIPod re-differentiated |             |            |             |
| Gene                                                    | Fold Change | Gene       | Fold Change | Gene                                                  | Fold Change | Gene       | Fold Change |
| ATM                                                     | ----        | Cyclin B   | ----        | ATM                                                   | 13.19       | Cyclin B   | ----        |
| ATR                                                     | ----        | Cyclin D   | ----        | ATR                                                   | ----        | Cyclin D   | ----        |
| CCNH                                                    | 1.36        | Cyclin E   | ----        | CCNH                                                  | 2.96        | Cyclin E   | ----        |
| CDC25A                                                  | 2.21        | DP1-E2F-Rb | ----        | CDC25A                                                | ----        | DP1-E2F-Rb | ----        |
| CDK1                                                    | 1.99        | E2f        | ----        | CDK1                                                  | ----        | E2f        | ----        |
| CDK2                                                    | 1.46        | GSK3B      | ----        | CDK2                                                  | 4.01        | GSK3B      | 2.14        |
| CDK4/6                                                  | ----        | Hdac       | ----        | CDK4/6                                                | ----        | Hdac       | ----        |
| CDK7                                                    | 1.40        | MYT1       | -1.17       | CDK7                                                  | 2.70        | MYT1       | -3.00       |
| CDKN1A                                                  | -2.90       | PP2A       | ----        | CDKN1A                                                | 6.89        | PP2A       | ----        |
| CDKN1B                                                  | 1.35        | RAF1       | 1.18        | CDKN1B                                                | 2.83        | RAF1       | ----        |
| CDKN1C                                                  | ----        | RB1        | 1.14        | CDKN1C                                                | -2.68       | RB1        | 29.82       |
| CDKN2A                                                  | 1.65        | Scf        | ----        | CDKN2A                                                | 6.84        | Scf        | ----        |
| CDKN2B                                                  | ----        | TFDP1      | 1.41        | CDKN2B                                                | ----        | TFDP1      | 11.27       |
| CDKN2C                                                  | 1.42        | Tgf beta   | ----        | CDKN2C                                                | -3.02       | Tgf beta   | ----        |
| CDKN2D                                                  | ----        | TP53       | 1.21        | CDKN2D                                                | ----        | TP53       | 9.81        |
| Cyclin A                                                | ----        | WEE1       | 1.57        | Cyclin A                                              | ----        | WEE1       | 19.11       |

**Table S5 – Summary table reporting fold variation for markers involved in Ca<sup>++</sup> signaling in podocytes A**  
detailed list of Ca<sup>++</sup> signaling related genes compared for differential expression between de-differentiated hIPod and undifferentiated hAKPC-P (on the left, light grey) and between re-differentiated hIPod and differentiated hAKPC-P (on the right, dark grey). Positive values indicate a higher gene expression in the hIPod versus the hAKPC-P, while negative values indicate a higher gene expression in hAKPC-P. All fold variations listed are statistically significant (P<0.05).

| Ca <sup>++</sup> /K <sup>+</sup> /Na <sup>+</sup> SIGNALING MARKERS |             |                              |             |                                                       |             |                              |             |
|---------------------------------------------------------------------|-------------|------------------------------|-------------|-------------------------------------------------------|-------------|------------------------------|-------------|
| hAKPC-P undifferentiated versus hIPod de-differentiated             |             |                              |             | hAKPC-P differentiated versus hIPod re-differentiated |             |                              |             |
| Gene                                                                | Fold Change | Gene                         | Fold Change | Gene                                                  | Fold Change | Gene                         | Fold Change |
| AKAP5                                                               | 1.74        | KCNMA1                       | -3.89       | AKAP5                                                 | ----        | KCNMA1                       | 3.05        |
| Alpha actin                                                         | ----        | KCNQ1                        | ----        | Alpha actin                                           | ----        | KCNQ1                        | -3.68       |
| ASPH                                                                | ----        | LETM1                        | -1.07       | ASPH                                                  | ----        | LETM1                        | ----        |
| ATP1A2                                                              | -1.11       | MAGI1                        | ----        | ATP1A2                                                | -3.55       | MAGI1                        | -1.85       |
| ATP2A1                                                              | ----        | MCU                          | ----        | ATP2A1                                                | ----        | MCU                          | 4.48        |
| ATP2A2                                                              | ----        | MEF2                         | ----        | ATP2A2                                                | 6.78        | MEF2                         | ----        |
| ATP2C1                                                              | -1.15       | MICU1                        | ----        | ATP2C1                                                | 6.07        | MICU1                        | 5.22        |
| CABIN1                                                              | -1.20       | MICU1-MCU                    | ----        | CABIN1                                                | -1.83       | MICU1-MCU                    | ----        |
| CACNA1C                                                             | ----        | Myosin                       | ----        | CACNA1C                                               | -4.54       | Myosin                       | ----        |
| CACNA1H                                                             | -1.16       | Ncx                          | ----        | CACNA1H                                               | -3.09       | Ncx                          | ----        |
| CACNG1                                                              | -1.11       | nAChRs                       | ----        | CACNG1                                                | -3.12       | nAChRs                       | ----        |
| Calcineurin protein(s)                                              | ----        | NMDA Receptor                | ----        | Calcineurin protein(s)                                | ----        | NMDA Receptor                | ----        |
| Calmodulin                                                          | ----        | NPHS1                        | -1.26       | Calmodulin                                            | ----        | NPHS1                        | -3.66       |
| CALR                                                                | -1.13       | Pka                          | ----        | CALR                                                  | 3.47        | Pka                          | ----        |
| CaMK I                                                              | ----        | Pmca                         | ----        | CaMK I                                                | ----        | Pmca                         | ----        |
| CAMK2D                                                              | -1.79       | Rap                          | ----        | CAMK2D                                                | 2.15        | Rap                          | ----        |
| CAMK4                                                               | 4.00        | Ryr                          | ----        | CAMK4                                                 | 2.46        | Ryr                          | ----        |
| CaMKII                                                              | ----        | RYR1                         | -1.11       | CaMKII                                                | ----        | RYR1                         | -3.34       |
| Camkk                                                               | ----        | RYR2                         | -1.08       | Camkk                                                 | ----        | RYR2                         | -2.67       |
| CASQ                                                                | ----        | RYR3                         | -1.15       | CASQ                                                  | ----        | RYR3                         | -2.74       |
| CHP                                                                 | -1.21       | SCN4A                        | -1.21       | CHP                                                   | 6.07        | SCN4A                        | -3.28       |
| CLCN1                                                               | -1.06       | SERCA                        | ----        | CLCN1                                                 | -2.62       | SERCA                        | ----        |
| Creb                                                                | ----        | SLC24A6                      | 1.09        | Creb                                                  | ----        | SLC24A6                      | ----        |
| ERK1/2                                                              | ----        | SLC5A3                       | -2.66       | ERK1/2                                                | ----        | SLC5A3                       | -1.30       |
| FXYD1                                                               | -1.09       | Tni                          | ----        | FXYD1                                                 | -3.78       | Tni                          | ----        |
| GRIA                                                                | ----        | TRDN                         | -1.02       | GRIA                                                  | ----        | TRDN                         | -1.70       |
| GRIK1                                                               | ----        | Tropomyosin                  | ----        | GRIK1                                                 | -2.69       | Tropomyosin                  | ----        |
| Hdac                                                                | ----        | Troponin C                   | ----        | Hdac                                                  | ----        | Troponin C                   | ----        |
| HTR3A                                                               | -1.05       | Troponin t                   | ----        | HTR3A                                                 | -3.27       | Troponin t                   | ----        |
| ITPR                                                                | ----        | TRP                          | ----        | ITPR                                                  | ----        | TRP                          | ----        |
| KCNB2                                                               | 1.27        | TRPC3                        | 1.29        | KCNB2                                                 | -2.11       | TRPC3                        | ----        |
| KCNE2                                                               | -1.33       | TRPC6                        | ----        | KCNE2                                                 | -3.21       | TRPC6                        | -2.58       |
| KCNJ12                                                              | -1.12       | VG Ca <sup>2+</sup> channels | ----        | KCNJ12                                                | -2.70       | VG Ca <sup>2+</sup> channels | ----        |

**Table S6 – Summary table reporting fold variation for contractility markers in podocytes** A detailed list of contractility genes compared for differential expression between de-differentiated hIPod and undifferentiated hAKPC-P (on the left, light grey) and between re-differentiated hIPod and differentiated hAKPC-P (on the right, dark grey). Positive values indicate a higher gene expression in the hIPod versus the hAKPC-P, while negative values indicate a higher gene expression in hAKPC-P. All fold variations listed are statistically significant (P<0.05).

| CONTRACTILITY MARKERS                                   |             |                |             |                                                       |             |                |             |
|---------------------------------------------------------|-------------|----------------|-------------|-------------------------------------------------------|-------------|----------------|-------------|
| hAKPC-P undifferentiated versus hIPod de-differentiated |             |                |             | hAKPC-P differentiated versus hIPod re-differentiated |             |                |             |
| Gene                                                    | Fold Change | Gene           | Fold Change | Gene                                                  | Fold Change | Gene           | Fold Change |
| ACTA1                                                   | ----        | MYH9           | ----        | ACTA1                                                 | -3.30       | MYH9           | 3.33        |
| ACTA2                                                   | -1.63       | MYL1           | ----        | ACTA2                                                 | -1.42       | MYL1           | -2.45       |
| ACTC1                                                   | 1.10        | MYL2           | -1.18       | ACTC1                                                 | -2.86       | MYL2           | ----        |
| ACTG2                                                   | ----        | MYL3           | ----        | ACTG2                                                 | -4.28       | MYL3           | -3.44       |
| ACTN2                                                   | ----        | MYL4           | -1.11       | ACTN2                                                 | -2.69       | MYL4           | -3.10       |
| ACTN3                                                   | ----        | MYL5           | -1.20       | ACTN3                                                 | ----        | MYL5           | -2.76       |
| ACTN4                                                   | ----        | MYL6           | -1.18       | ACTN4                                                 | 1.62        | MYL6           | -1.79       |
| AGT                                                     | -1.08       | MYL6B          | ----        | AGT                                                   | ----        | MYL6B          | ----        |
| ANXA6                                                   | -1.20       | MYL9           | ----        | ANXA6                                                 | 3.13        | MYL9           | 1.68        |
| ARHGAP24                                                | -1.83       | MYLK           | ----        | ARHGAP24                                              | -1.45       | MYLK           | ----        |
| ARID5B                                                  | -1.71       | MYLK2          | ----        | ARID5B                                                | ----        | MYLK2          | -3.30       |
| Arp2/3                                                  | ----        | MYLPF          | 1.01        | Arp2/3                                                | ----        | MYLPF          | -2.62       |
| AVP                                                     | ----        | MYO10          | -1.53       | AVP                                                   | ----        | MYO10          | 2.61        |
| C3                                                      | 1.53        | MYO1B          | -1.15       | C3                                                    | 12.61       | MYO1B          | 9.19        |
| CALCB                                                   | -1.52       | MYO1C          | -1.10       | CALCB                                                 | -3.08       | MYO1C          | 3.29        |
| CAPZA1                                                  | 1.07        | MYO1D          | 3.02        | CAPZA1                                                | 1.72        | MYO1D          | ----        |
| CAPZA2                                                  | ----        | MYO1E          | -1.14       | CAPZA2                                                | -1.39       | MYO1E          | 2.12        |
| CAPZB                                                   | -1.09       | MYO6           | 1.23        | CAPZB                                                 | 2.42        | MYO6           | 7.23        |
| CASQ1                                                   | ----        | MYOCD          | 1.01        | CASQ1                                                 | -3.12       | MYOCD          | 4.38        |
| CAV1                                                    | -1.52       | MYOF           | -1.04       | CAV1                                                  | 33.76       | MYOF           | 17.44       |
| CAV3                                                    | -1.44       | MYOM1          | -1.04       | CAV3                                                  | -3.09       | MYOM1          | -2.57       |
| CD2AP                                                   | 1.44        | MYOM2          | -1.04       | CD2AP                                                 | 10.04       | MYOM2          | -2.79       |
| CNN1                                                    | 1.95        | Myosin2        | ----        | CNN1                                                  | ----        | Myosin2        | ----        |
| COL4A3BP                                                | -1.07       | MYOT           | ----        | COL4A3BP                                              | 1.77        | MYOT           | -3.05       |
| CTGF                                                    | -1.14       | NEB            | ----        | CTGF                                                  | 4.63        | NEB            | ----        |
| CTSL2                                                   | 1.36        | NKX2-5         | -1.11       | CTSL2                                                 | ----        | NKX2-5         | -2.30       |
| CTTN                                                    | -1.18       | NMU            | -1.23       | CTTN                                                  | 4.01        | NMU            | -2.33       |
| CXCR4                                                   | -1.02       | NOS1           | -1.05       | CXCR4                                                 | -2.00       | NOS1           | -2.72       |
| DES                                                     | ----        | NPHS1          | -1.26       | DES                                                   | -3.06       | NPHS1          | -3.66       |
| DTNA                                                    | ----        | NPHS2          | ----        | DTNA                                                  | ----        | NPHS2          | -2.81       |
| EDN1                                                    | -2.00       | PAR3-PAR6-aPKC | ----        | EDN1                                                  | 9.06        | PAR3-PAR6-aPKC | ----        |
| EDN2                                                    | -1.57       | PLCE1          | -1.39       | EDN2                                                  | -2.78       | PLCE1          | 4.61        |
| EGF                                                     | 1.58        | PXN            | -1.60       | EGF                                                   | -1.90       | PXN            | ----        |
| ELANE                                                   | -1.00       | RHOA           | 1.03        | ELANE                                                 | -3.39       | RHOA           | 1.63        |
| EZR                                                     | -1.02       | ROCK1          | 1.73        | EZR                                                   | 4.15        | ROCK1          | 10.32       |
| F Actin                                                 | ----        | ROCK2          | 1.10        | F Actin                                               | ----        | ROCK2          | 3.01        |
| FKBP1A                                                  | -1.31       | RRAD           | 1.10        | FKBP1A                                                | 5.14        | RRAD           | 1.54        |
| FLT1                                                    | -1.21       | SGCA           | -1.11       | FLT1                                                  | -2.22       | SGCA           | -3.30       |
| GJA1                                                    | -2.54       | SLN            | 1.62        | GJA1                                                  | 10.16       | SLN            | ----        |
| GJC1                                                    | ----        | SMAD5          | 1.05        | GJC1                                                  | ----        | SMAD5          | 7.26        |
| HOMER1                                                  | ----        | SMPX           | ----        | HOMER1                                                | ----        | SMPX           | ----        |
| HSBP1                                                   | 1.62        | SMTN           | -1.49       | HSBP1                                                 | 4.04        | SMTN           | 1.52        |
| ID1                                                     | -1.68       | SNTA1          | 1.05        | ID1                                                   | ----        | SNTA1          | -2.14       |
| ID2                                                     | -1.72       | SNTB1          | 1.10        | ID2                                                   | ----        | SNTB1          | 2.06        |
| ID3                                                     | -1.36       | SPHK1          | 1.40        | ID3                                                   | ----        | SPHK1          | 1.65        |
| IGF1                                                    | -1.26       | SRF            | ----        | IGF1                                                  | -3.87       | SRF            | -2.23       |
| ILK                                                     | ----        | SRI            | -1.08       | ILK                                                   | 1.33        | SRI            | 15.44       |
| INF2                                                    | ----        | SRSF1          | 1.13        | INF2                                                  | ----        | SRSF1          | -1.64       |
| ITGA2                                                   | -1.22       | SYNPO          | -1.38       | ITGA2                                                 | 12.32       | SYNPO          | -1.99       |
| JSRP1                                                   | -1.12       | TAC3           | -1.11       | JSRP1                                                 | -3.18       | TAC3           | -2.77       |
| KNG1                                                    | ----        | Talin          | ----        | KNG1                                                  | ----        | Talin          | ----        |
| MAP2K1                                                  | -1.32       | TNNC1          | -1.10       | MAP2K1                                                | 3.34        | TNNC1          | -3.74       |
| MAP2K3                                                  | ----        | TNNC2          | -1.15       | MAP2K3                                                | -1.34       | TNNC2          | -3.64       |
| MAP2K6                                                  | -1.29       | TNNI1          | -1.14       | MAP2K6                                                | -3.94       | TNNI1          | -3.40       |
| MBNL1                                                   | 1.27        | TNNI2          | -1.10       | MBNL1                                                 | -1.37       | TNNI2          | -3.68       |
| MMP1                                                    | -10.88      | TNNI3          | -1.03       | MMP1                                                  | -1.33       | TNNI3          | -2.67       |
| MYBPC1                                                  | ----        | TNNT1          | -1.37       | MYBPC1                                                | ----        | TNNT1          | -1.71       |
| MYBPC2                                                  | -1.16       | TNNT2          | -1.26       | MYBPC2                                                | -2.88       | TNNT2          | -4.69       |
| MYBPC3                                                  | -1.02       | TNNT3          | -1.08       | MYBPC3                                                | -3.06       | TNNT3          | -3.61       |
| MYBPH                                                   | -1.09       | TPM1           | ----        | MYBPH                                                 | -3.78       | TPM1           | ----        |
| MYH1                                                    | -1.06       | TPM2           | -1.73       | MYH1                                                  | ----        | TPM2           | 1.55        |
| MYH10                                                   | ----        | Tpm4           | ----        | MYH10                                                 | 1.72        | Tpm4           | ----        |
| MYH11                                                   | ----        | TRPV1          | -1.13       | MYH11                                                 | ----        | TRPV1          | ----        |
| MYH13                                                   | -1.12       | TTN            | -1.09       | MYH13                                                 | -3.04       | TTN            | -2.84       |
| MYH14                                                   | -1.06       | UCN            | -1.19       | MYH14                                                 | -3.71       | UCN            | -3.23       |
| MYH2                                                    | -1.26       | UTRN           | -1.02       | MYH2                                                  | -2.43       | UTRN           | 5.28        |
| MYH4                                                    | -1.21       | UTS2           | ----        | MYH4                                                  | -2.87       | UTS2           | ----        |
| MYH6                                                    | -1.08       | VCL            | -1.10       | MYH6                                                  | -3.14       | VCL            | 3.39        |
| MYH7                                                    | ----        | VEGFB          | ----        | MYH7                                                  | -2.37       | VEGFB          | ----        |
